# Supplementary material for: Optimized hot injection and HCl purification for high quality Cu2ZnSnS4 nanoparticles
Source: Royal Society of Chemistry journal article supplement (doi:10.1039/d4na00843j), 2024-11-18
Supplement: d4na00843j1.pdf [file d4na00843j1.pdf]

## Electronic Supplementary Information for

# Optimized hot injection and HCl purification for high quality $\text{Cu}_2\text{ZnSnS}_4$ Nanoparticles

Amin Hasan Husien<sup>\*a,b</sup>, Giorgio Tseberlidis<sup>\*a</sup>, Vanira Trifiletti<sup>a</sup>, Elisa Fabbretti<sup>a</sup>, Silvia Mostoni<sup>a</sup>, James McGettrick<sup>c</sup>, Trystan Watson<sup>c</sup>, Riccardo Po<sup>b</sup>, and Simona Binetti<sup>a</sup>

<sup>a</sup> *Department of Materials Science and Solar Energy Research Center (MIB-SOLAR), University of Milano-Bicocca, Via Cozzi 55, I-20125, Milan, Italy;*

<sup>b</sup> *New Energies, Renewable Energies and Materials Science Research Center Istituto Donegani, Eni S.p.A., via Fauser 4, I-28100, Novara, Italy.*

<sup>c</sup> *SPECIFIC IKC, Faculty of Science and Engineering, Swansea University, Fabian way, Swansea, SA1 8EN, United Kingdom.*

**\*Corresponding authors:** Giorgio Tseberlidis: [giorgio.tseberlidis@unimib.it](mailto:giorgio.tseberlidis@unimib.it);

Amin Hasan Husien: [aminhasan.husien@unimib.it](mailto:aminhasan.husien@unimib.it)

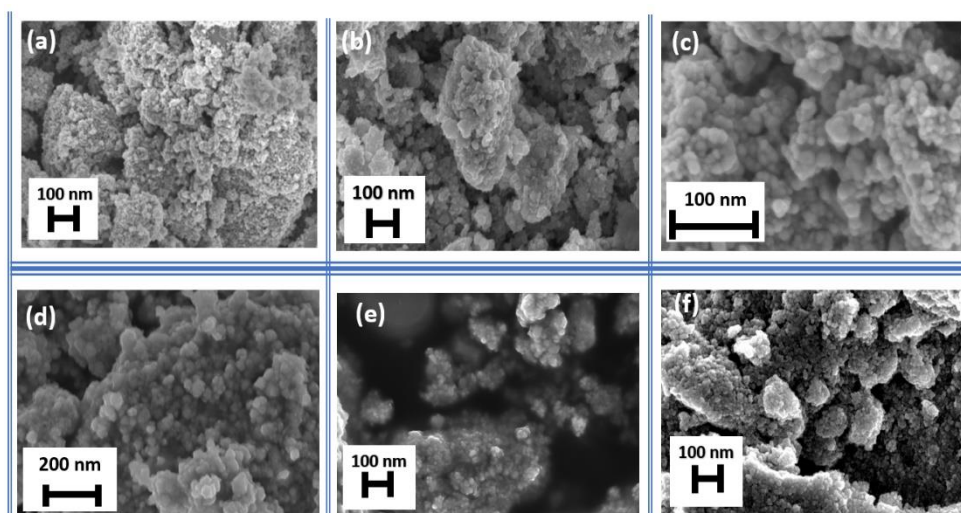

**Fig. S1:** Scanning electron microscopy images of CZTS NPs obtained with different injection temperatures at scales of 100 nm and 200 nm; (a) 210 °C, (b) 225 °C, (c) 235 °C, (d) 240 °C, (e) 260 ° and (f) 270 °C.

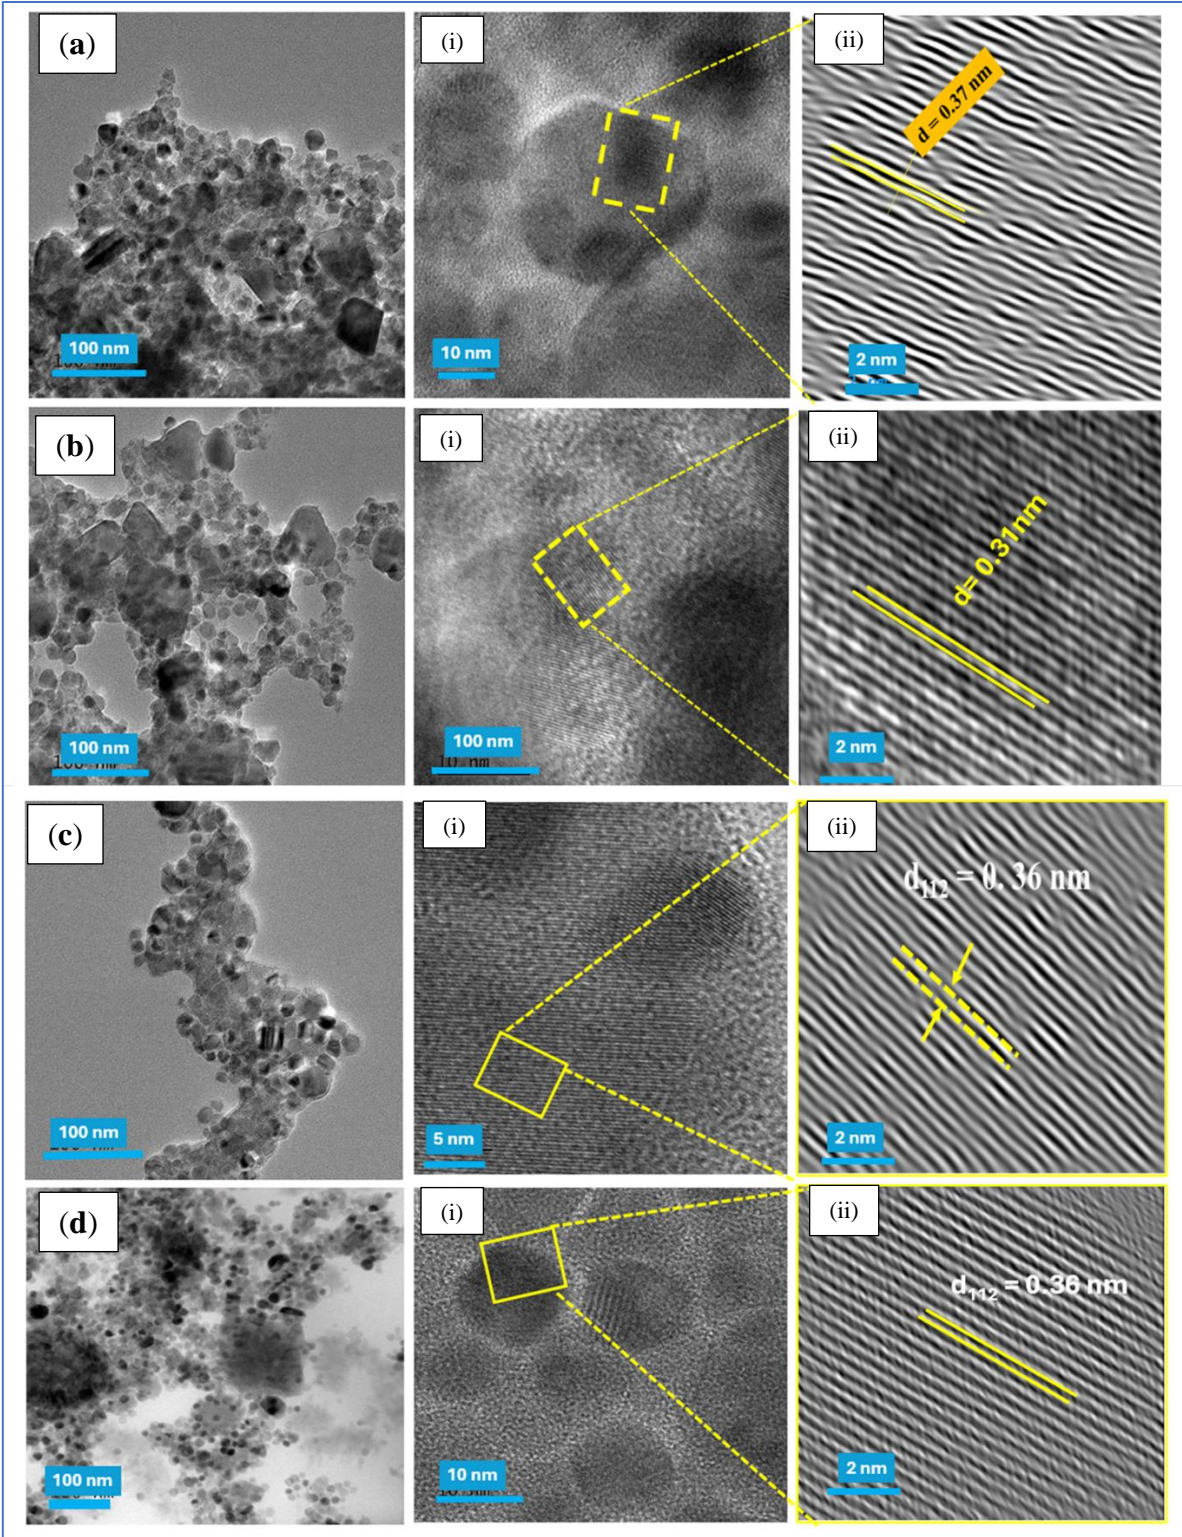



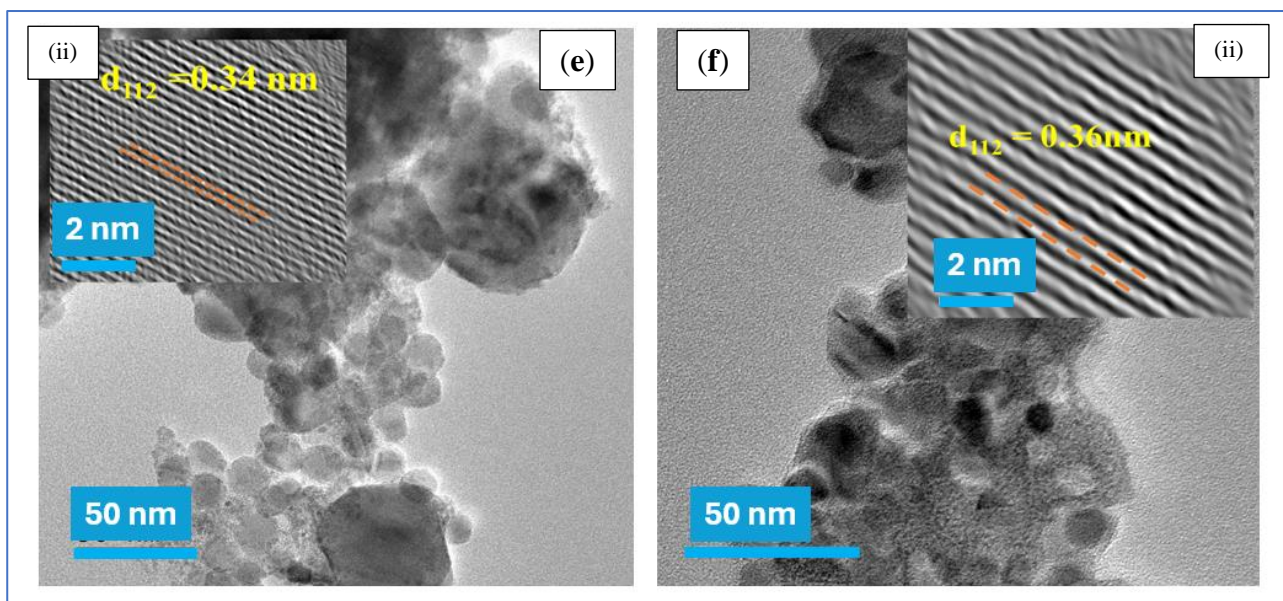

**Fig. S2:** TEM images of so-obtained CZTS NPs synthesised under different injection temperatures: (a) 210 °C, (b) 225 °C, (c) 235 °C, (d) 240 °C, (e) 260 °C and (f) 270 °C, respectively; (i) high-resolution (HR)TEM image of CZTS NPs; (ii) lattice fringes in a single nanoparticle.

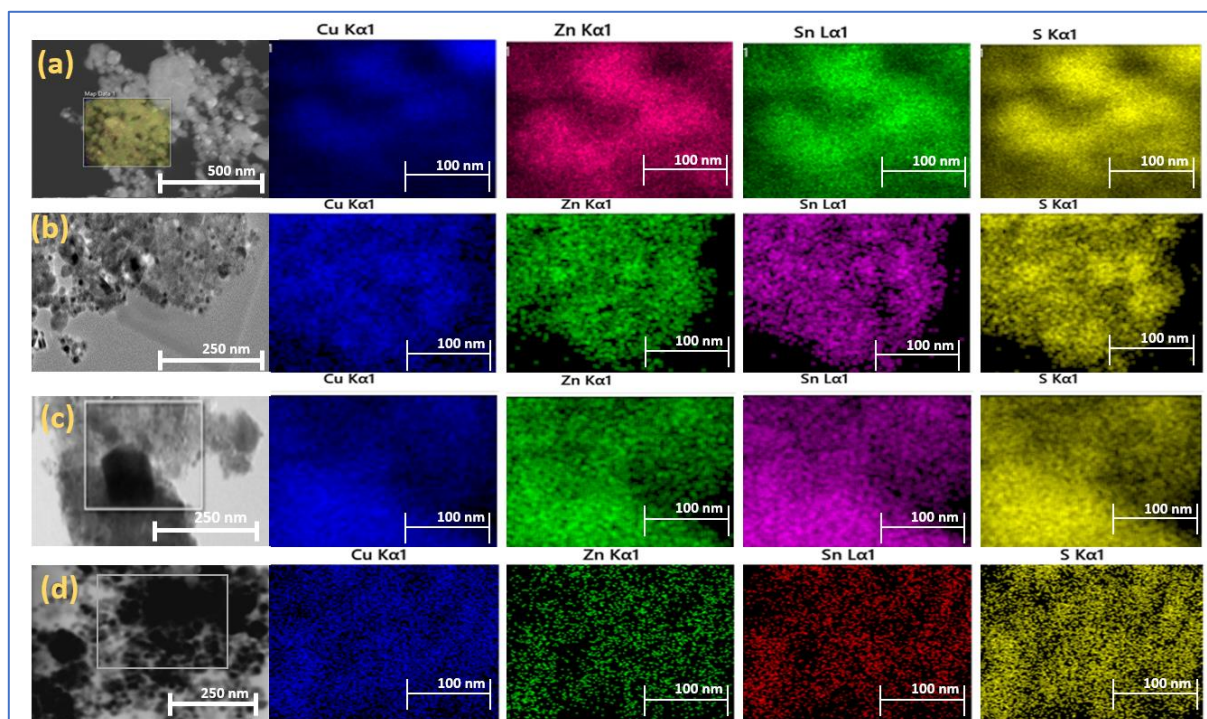

**Fig. S3:** STEM-EDS elemental map of CZTS NPs synthesised under different injection temperatures: (a) 210 °C, (b) 235 °C, (c) 240 °C and (d) 270 °C. The images were obtained on JEOL JEM-2100PLUS with an emission voltage of 200 kV.

**Table S1:** Angle, and FWHM of CZTS NPs synthesized at 240 °C for 30 min

| Sample         | Angle<br>( $2\theta$ ) | FWHM<br>(degree) |
|----------------|------------------------|------------------|
| Un treated-HCl | 28.2                   | 0.59             |
| Treated-HCl    | 28.3                   | 0.54             |

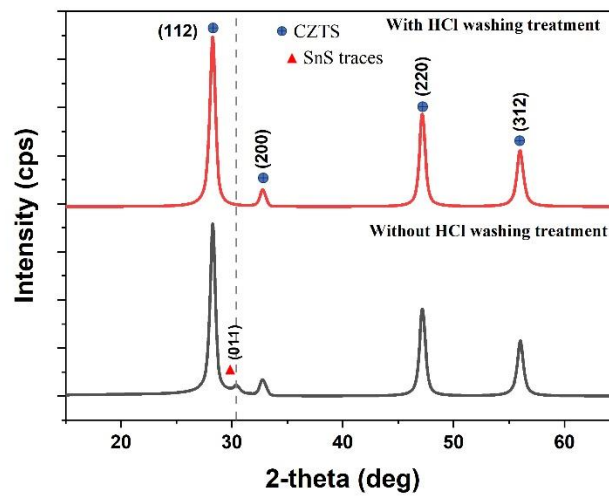

**Fig. S4:** XRD patterns of CZTS NPs synthesized at 240 °C; before washing with HCl solution referred as “untreated with HCl” (black line spectra) and after washing with HCl referred as “treated with HCl” (red line spectrum).

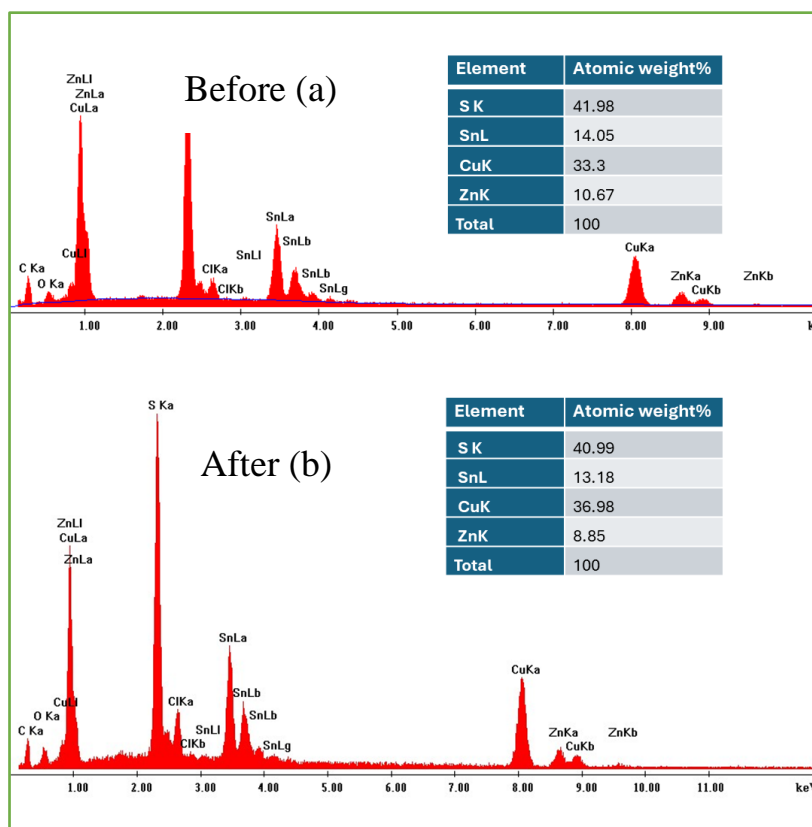

**Fig. S5:** EDS composition of CZTS NPs synthesized at 240 °C; (a) before and (b) after HCl treatment; the inset (tables) indicate their corresponding elemental composition before and after HCl treatment.

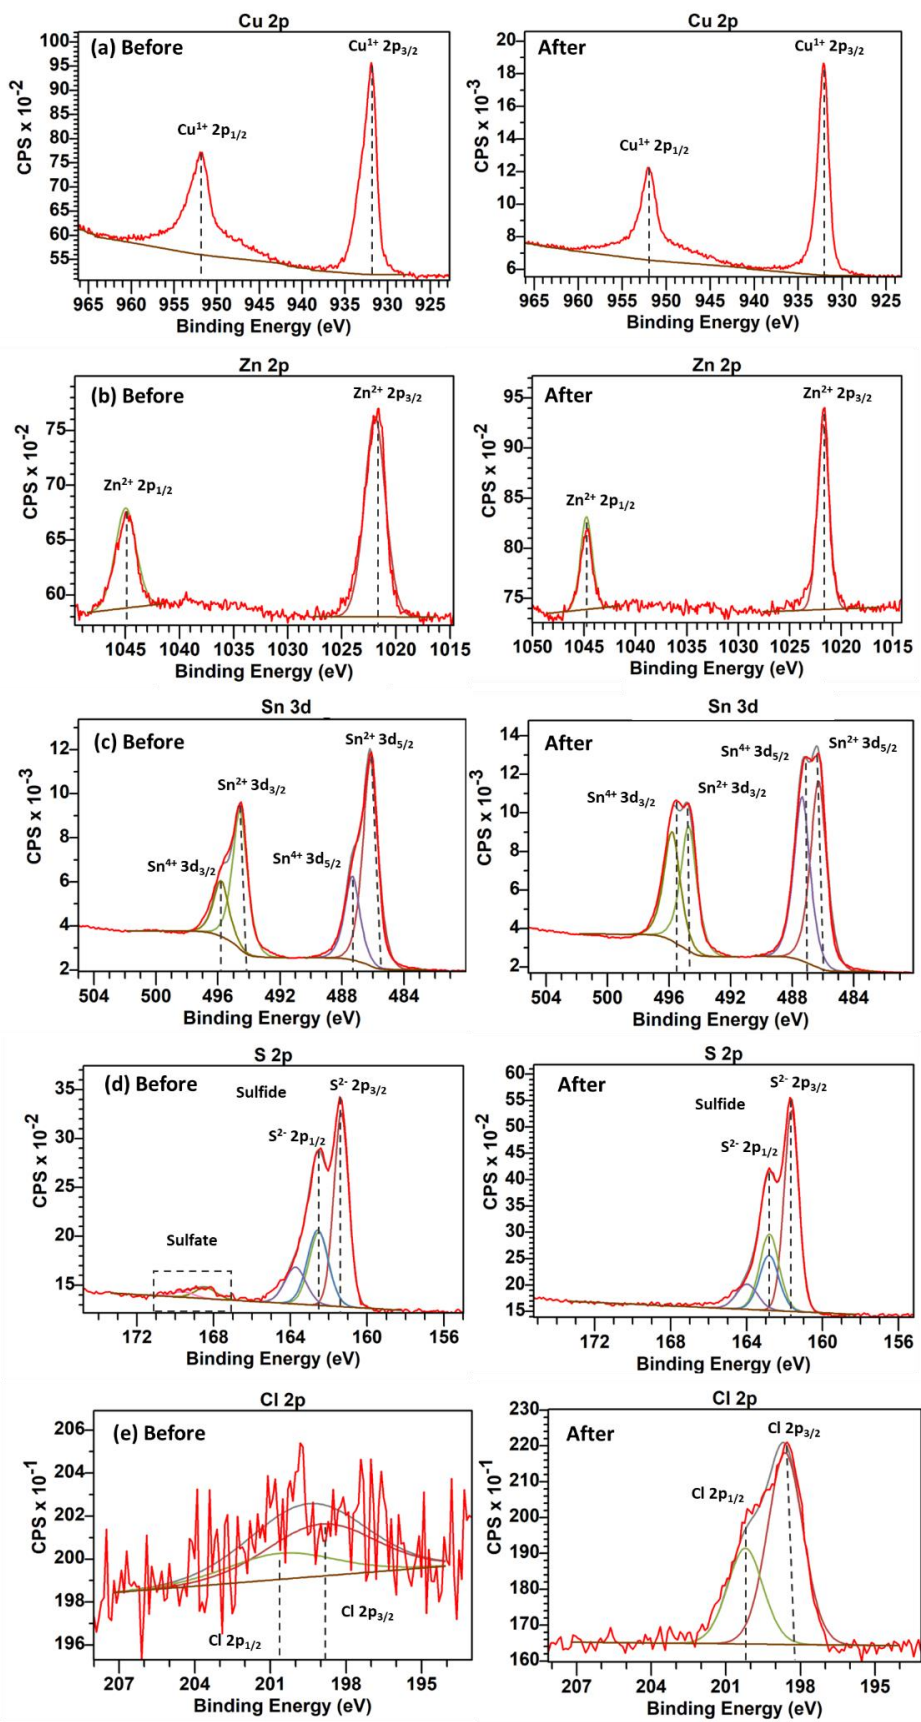

**Fig. S6:** High resolution XPS of (a) Cu 2p, (b) Zn 2p, (c) Sn 3d, (d) S 2p and (e) Cl 2p core-levels in the CZTS NPs synthesized at 240 °C, before and after the HCl treatment.

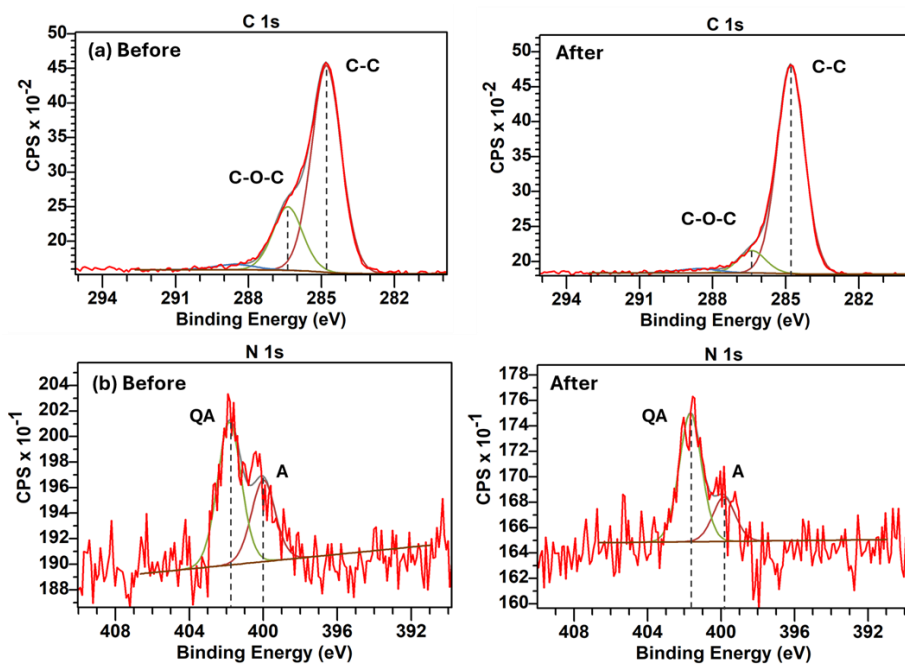

**Fig S7:** High-resolution XPS of (a) C 1s (C-C and C-O-C chemical states), and (b) N 1s (amine A and quaternary amine QA) contaminations related to residual oleylamine in the dried CZTS NPs. The spectra are compared before and after the HCl treatment.



**Table S2:** Peaks positions for the XPS spectra of Cu 2p, Zn 2p, Sn 3d, S 2p and the corresponding peak separation binding energies, before and after the HCl treatment.

| Element                | Before                      | Peak Separation before | After                       | Peak Separation after |
|------------------------|-----------------------------|------------------------|-----------------------------|-----------------------|
| <b>Cu<sup>1+</sup></b> | 2p <sub>3/2</sub> 932.0 eV  | 19.8 eV                | 2p <sub>3/2</sub> 932.1 eV  | 19.9 eV               |
|                        | 2p <sub>1/2</sub> 951.8 eV  |                        | 2p <sub>1/2</sub> 952.0 eV  |                       |
| <b>Zn<sup>2+</sup></b> | 2p <sub>3/2</sub> 1021.8 eV | 23.2 eV                | 2p <sub>3/2</sub> 1021.6 eV | 23.2 eV               |
|                        | 2p <sub>1/2</sub> 1045.0 eV |                        | 2p <sub>1/2</sub> 1044.8 eV |                       |
| <b>Sn<sup>2+</sup></b> | 3d <sub>5/2</sub> 486.2 eV  | 8.3 eV                 | 3d <sub>5/2</sub> 486.3 eV  | 8.4 eV                |
|                        | 3d <sub>3/2</sub> 494.5 eV  |                        | 3d <sub>3/2</sub> 494.7 eV  |                       |
| <b>Sn<sup>4+</sup></b> | 3d <sub>5/2</sub> 487.4 eV  | 8.4 eV                 | 3d <sub>5/2</sub> 487.3 eV  | 8.4 eV                |
|                        | 3d <sub>3/2</sub> 495.8 eV  |                        | 3d <sub>3/2</sub> 495.7 eV  |                       |
| <b>S<sup>2-</sup></b>  | 2p <sub>3/2</sub> 161.3 eV  | 1.1 eV                 | 2p <sub>3/2</sub> 161.7 eV  | 1.1 eV                |
|                        | 2p <sub>1/2</sub> 162.4 eV  |                        | 2p <sub>1/2</sub> 162.8 eV  |                       |

**Table S3:** Atomic percentage S in sulphate and in sulphide phases over the total sulphur amount, and C and N total composition, before and after the HCl treatment.

| HCl treatment  | Sulphate / % of total sulphur | Sulphide / % of total sulphur | Carbon / % of total composition | Nitrogen / % of total composition |
|----------------|-------------------------------|-------------------------------|---------------------------------|-----------------------------------|
| Before washing | 8.7                           | 91.3                          | 48.72                           | 1.66                              |
| After washing  | 1.7                           | 98.3                          | 37.80                           | 0.33                              |

**Table S4:** Work Function, Valence band and Ionizing Potential by UPS for CZTS NPs powder before and after HCL washing.

| HCl treatment | WF UPS    | VB UPS      | IP (eV)   |
|---------------|-----------|-------------|-----------|
| Before        | 4.4 ± 0.1 | 0.22 ± 0.04 | 4.7 ± 0.1 |
| After         | 4.2 ± 0.2 | 0.39 ± 0.13 | 4.5 ± 0.1 |

**Table S5:** equations for the reactions involved in the CZTS nanoparticles formation

| Reactions                                                                                                               | Temperature range                |
|-------------------------------------------------------------------------------------------------------------------------|----------------------------------|
| $2\text{Cu(II)} + \text{Sn(II)} \rightarrow 2\text{Cu(I)} + \text{Sn(IV)}$                                              | From 100 to 180 °C               |
| $2\text{Cu(I)} + \text{Zn(II)} + \text{Sn(IV)} + 4\text{S} \rightarrow \text{Cu}_2\text{S} + \text{ZnS} + \text{SnS}_2$ | Above 230 °C (after S injection) |
| $\text{Cu}_2\text{S} + \text{ZnS} + \text{SnS}_2 \rightarrow \text{Cu}_2\text{ZnSnS}_4$                                 | Between 230 and 280 °C           |

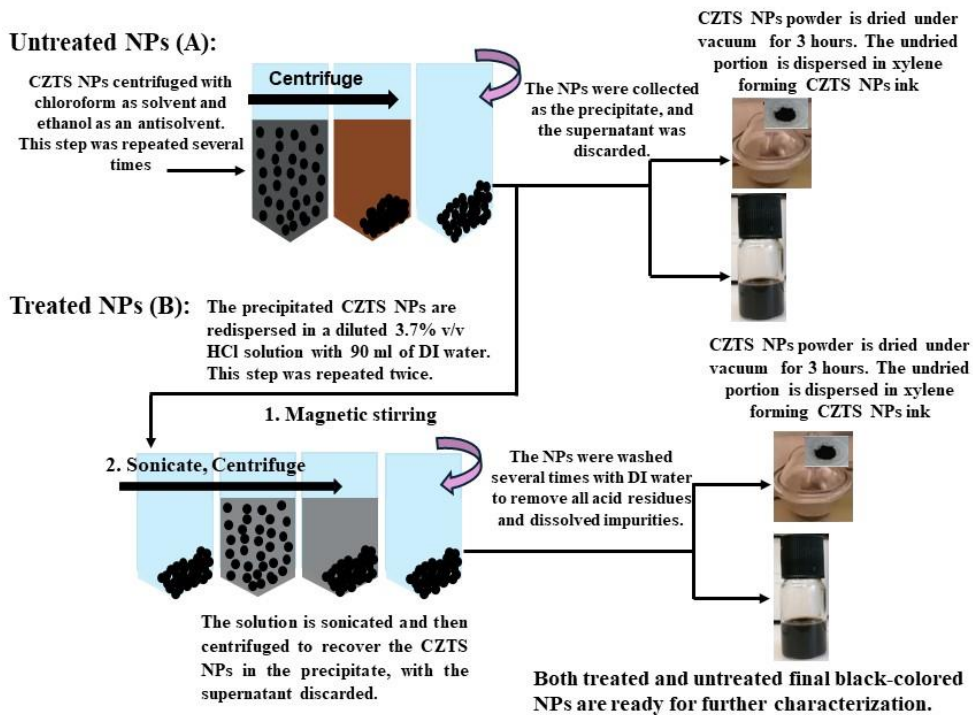

**Fig. S8:** The schematic of purification steps and CZTS NPs ink
